# Supplementary material for: Fiber optic cadmium ion sensors based on functionalization of a magnetic ion-imprinted polymer
Source: Royal Society of Chemistry journal article supplement (doi:10.1039/d3an02067c), 2024-01-01
Supplement: d3an02067c1.pdf [file d3an02067c1.pdf]

## Supporting Information

### **Fiber optic cadmium ion sensor based on functionalization of magnetic ion-imprinted polymer**

Tao Shen,<sup>1,2</sup> Tianyu Yang,<sup>1</sup> Yue Feng,<sup>2,\*</sup> Xin Liu,<sup>1</sup> Chi Liu,<sup>1</sup> Weixiang Yuan,<sup>1</sup> and  
Haodong Wu,<sup>2</sup> Chao Wang,<sup>3</sup>

*<sup>1</sup>Heilongjiang Province Key Laboratory of Laser Spectroscopy Technology and  
Application, Harbin University of Science and Technology, Harbin 150080, China;*

*<sup>2</sup>Key Laboratory of Engineering Dielectrics and Its Application, Ministry of  
Education, Harbin University of Science and Technology, Harbin, 150080, China;*

*<sup>3</sup>School of Engineering University of Kent Canterbury, Unite K ingdom, Unite  
Kingdom.*

\*Corresponding author: Yue Feng.

E-mail: yuefengchn@126.com.

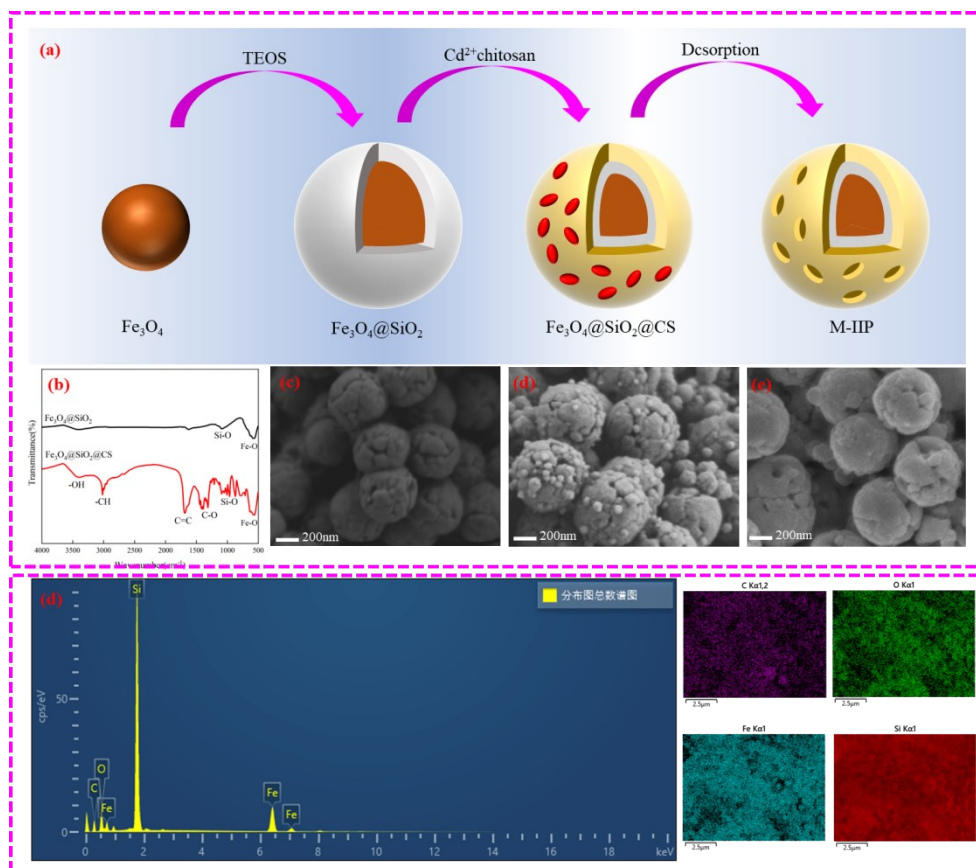

Fig. S1. (a) Preparation steps of M-IIP; (b) infrared spectra of  $\text{Fe}_3\text{O}_4@\text{SiO}_2$  and M-IIP.; (c) SEM characterization of N-IIP; (d) SEM characterization of M-IIP(Cadmium addition); (e) SEM characterization of M-IIP(Cadmium removal); (f) EDS characterization of M-IIP(Cadmium removal).

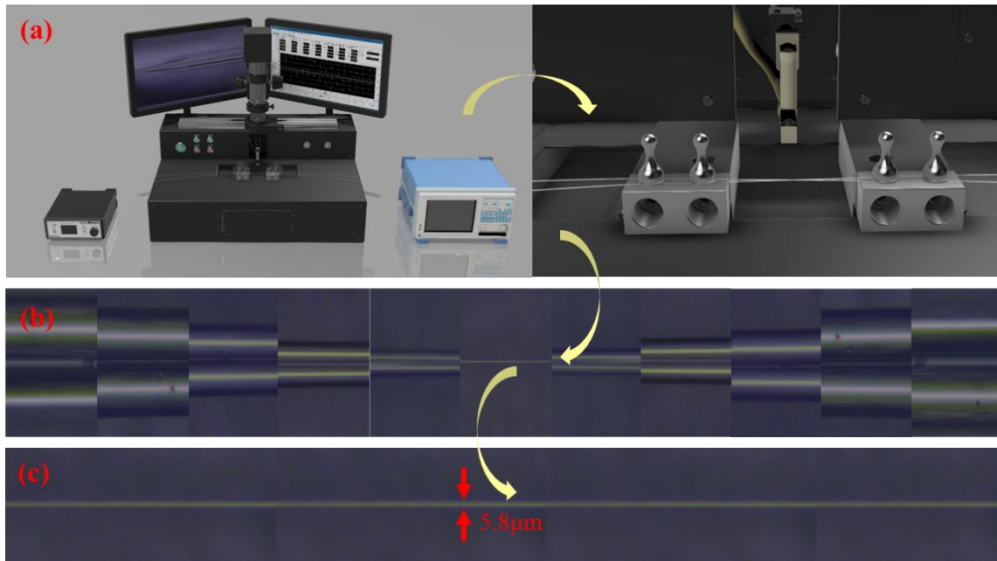

Fig. S2. Schematic diagram of OMC preparation step: (a) OMC preparation platform; (b) structure diagram of OMC; (c) local amplification diagram of the strong coupling area of OMC.

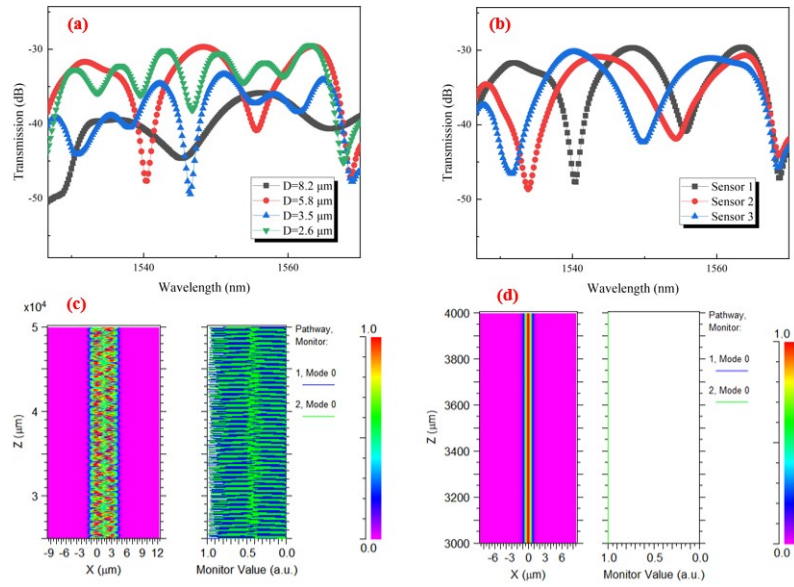

Fig. S3. (a) interference spectrum of the OMC; (b) repeat preparation of sensors; (c) strong coupling phase of the OMC; (d) final coupling stabilization phase of the OMC.

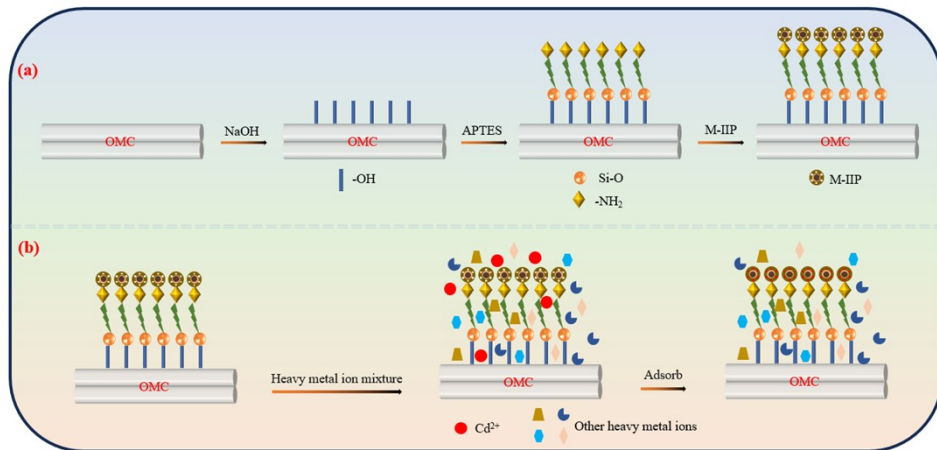

Fig. S4. Functionalization and modification steps of sensitive materials in the OMC coupling zone.

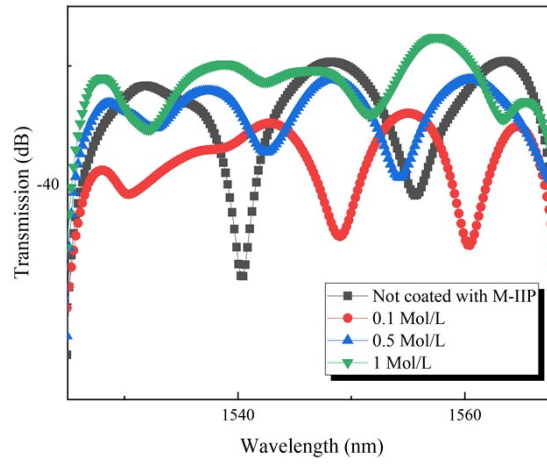

Fig. S5. Interference spectrum changes before and after OMC coating with sensitive materials.
